# Supplementary material for: Targeted Sequencing of Germline Breast Cancer Susceptibility Genes for Discovering Pathogenic/Likely Pathogenic Variants in the Jakarta Population
Source: MDPI journal article supplement (doi:10.3390/diagnostics12092241), 2022-09-16
Supplement: s1 [file s1]

**Table S1.** Gene List.

| <b>Number</b> | <b>Gene</b> |
|---------------|-------------|
| 1             | ATM         |
| 2             | BRIP1       |
| 3             | MLH1        |
| 4             | NBN         |
| 5             | RAD50       |
| 6             | TP53        |
| 7             | BARD1       |
| 8             | CDH1        |
| 9             | MRE11A      |
| 10            | PALB2       |
| 11            | RAD51C      |
| 12            | XRCC2       |
| 13            | BRCA1       |
| 14            | CHEK2       |
| 15            | MSH2        |
| 16            | PMS2        |
| 17            | RAD51D      |
| 18            | BRCA2       |
| 19            | EPCAM       |
| 20            | MSH6        |
| 21            | PTEN        |
| 22            | RINT1       |

**Table S2.** Distribution of P/LP-Vs in multiple P/LP-Vs carriers.

| Carriers ID    | Genes | HGVsg                                    | Carriers ID     | Genes | HGVsg                                        |
|----------------|-------|------------------------------------------|-----------------|-------|----------------------------------------------|
| brca14_rscm_17 | ATM   | 11:g.108282707delinsCATACAACACTAAAAAATG  | brca79_rscm_17  | BRCA1 | 17:g.43091349delinsTTTAAAGTGCAGCTTTTC        |
|                | BRCA2 | 13:g.32333103delinsTA                    |                 | PMS2  | 7:g.5987583_5987584delinsC                   |
|                | MSH6  | 2:g.47806453delinsCTTAGAT                |                 | STK11 | 19:g.1219400_1219456delinsT                  |
| brca25_rscm_17 | BRCA2 | 13:g.32379885delinsCA                    | brca80_rscm_17  | ATM   | 11:g.108345760delinsTCAGTAGCTCAAGGG          |
|                | STK11 | 19:g.1219400_1219456delinsT              |                 | BRCA2 | 13:g.32316515_32316516delinsT                |
| brca28_rscm_17 | BRCA2 | 13:g.32379885delinsCA                    |                 | STK11 | 19:g.1219400_1219456delinsT                  |
|                | PMS2  | 7:g.5987525_5987526delinsC               | brca82_rscm_17  | BRCA2 | 13:g.32379885delinsCA                        |
| brca37_rscm_17 | BRCA2 | 13:g.32332277delinsGCATACAT              |                 | PMS2  | 7:g.5987525_5987526delinsC                   |
|                | CDKN2 | 9:g.21974732_21974737delinsC             | brca85_rscm_17  | BRCA2 | 13:g.32379885delinsCA                        |
|                | RAD50 | 5:g.132595759_132595760delinsT           |                 | PMS2  | 7:g.5987525_5987526delinsC                   |
|                | TP53  | 17:g.7674917delinsTC                     |                 | STK11 | 19:g.1219400_1219456delinsT                  |
| brca48_rscm_17 | PMS2  | 7:g.5987525_5987526delinsC               | brca86_rscm_17  | ATM   | 11:g.108326058delinsCCTTCTTCCAACAGAAACGATTGT |
|                | PTEN  | 10:g.87965294delinsTCTTATCA              |                 | BRCA2 | 13:g.32379885delinsCA                        |
| brca58_rscm_17 | PALB2 | 16:g.23635659_23635660delinsA            | brca89_rscm_17  | BRCA2 | 13:g.32379885delinsCA                        |
|                | PMS2  | 7:g.5987525delinsCT                      |                 | PMS2  | 7:g.5987525delinsCT                          |
| brca59_rscm_17 | BRCA1 | 17:g.43093581_43093582delinsT            |                 | STK11 | 19:g.1219400_1219456delinsT                  |
|                | MSH6  | 2:g.47803500delinsAC                     | brca90_rscm_17  | BRCA2 | 13:g.32379885delinsCA                        |
|                | RAD50 | 5:g.132595759_132595760delinsT           |                 | PMS2  | 7:g.5987525_5987526delinsC                   |
|                | RAD51 | 17:g.58734130delinsAATCCAGGAAATGCAGAAGAG | brca91_rscm_17  | PALB2 | 16:g.23635659_23635660delinsA                |
| brca67_rscm_17 | MSH6  | 2:g.47803500delinsAC                     |                 | STK11 | 19:g.1219400_1219456delinsT                  |
|                | PALB2 | 16:g.23635659_23635660delinsA            | brca93_rscm_17  | PMS2  | 7:g.5987525delinsCT                          |
|                | RAD50 | 5:g.132595759_132595760delinsT           |                 | STK11 | 19:g.1219400_1219456delinsT                  |
| brca72_rscm_17 | BRCA1 | 17:g.43093821_43093822delinsT            | brca98_rscm_17  | BRCA2 | 13:g.32379885delinsCA                        |
|                | STK11 | 19:g.1219400_1219456delinsT              |                 | BRIP1 | 17:g.61683605_61683606delinsA                |
| brca73_rscm_17 | ATM   | 11:g.108245025_108245026delinsA          |                 | MSH6  | 2:g.47803657_47803658delinsT                 |
|                | BRIP1 | 17:g.61683605_61683606delinsA            |                 | RAD50 | 5:g.132595759_132595760delinsT               |
|                | STK11 | 19:g.1219400_1219456delinsT              |                 | BRCA2 | 13:g.32379885delinsCA                        |
| brca74_rscm_17 | BRCA2 | 13:g.32338277delinsGACTTTGACAGAAA        | brca100_rscm_17 | PMS2  | 7:g.5987525_5987526delinsC                   |
|                | PALB2 | 16:g.23635659_23635660delinsA            |                 | RAD50 | 5:g.132595759_132595760delinsT               |
|                | TP53  | 17:g.7674917delinsTC                     |                 |       |                                              |

Carriers ID with bold text have familial history (mother/aunt/grandmother) in breast cancer

**Table S3.** Potentially pathogenic VUS detected in breast cancer susceptibility genes.

| Gene   | HGVScg                   | Type of variant | dbSNP / ClinVar ID | Number of carriers |
|--------|--------------------------|-----------------|--------------------|--------------------|
| BRCA1  | 17:g.43093594delinsCAAAA | Frameshift      | -                  | 1                  |
| BRCA2  | 13:g.32354874C>T         | Missense        | rs41293505         | 1                  |
| STK11  | 19:g.1221967C>T          | Missense        | -                  | 1                  |
|        | 19:g.1226589G>A          | Missense        | rs775978755        | 1                  |
|        | 19:g.1222992C>T          | Missense        | rs750366043        | 1                  |
|        | 19:g.1219346G>A          | Missense        | rs567769257        | 1                  |
| ATM    | 11:g.108247122C>T        | Missense        | 950587             | 1                  |
|        | 11:g.108271274G>A        | Missense        | rs749471737        | 1                  |
|        | 11:g.108335101C>T        | Missense        | rs1591192429       | 1                  |
| PALB2  | 16:g.23624080C>G         | Missense        | rs372931676        | 1                  |
| BRIP1  | 17:g.61808594C>T         | Missense        | rs758360637        | 1                  |
|        | 17:g.61799232C>T         | Missense        | rs786202780        | 1                  |
|        | 17:g.61799193C>T         | Missense        | rs772570870        | 1                  |
|        | 17:g.61780973T>C         | Missense        | rs1567813893       | 1                  |
| CHEK2  | 22:g.28725253C>T         | Missense        | rs587781667        | 1                  |
| BARD1  | 2:g.214781051A>T         | Missense        | rs776157713        | 1                  |
|        | 2:g.214730494G>T         | Missense        | rs1553612535       | 1                  |
|        | 2:g.214728819G>A         | Missense        | rs76744638         | 3                  |
| MLH1   | 3:g.36993576G>T          | Missense        | rs777971423        | 1                  |
|        | 3:g.37028831C>T          | Missense        | rs532873141        | 1                  |
| MSH2   | 2:g.47414338C>G          | Missense        | 953109             | 3                  |
|        | 2:g.47414418G>T          | Missense        | rs587779197        | 2                  |
| MSH6   | 2:g.47798716A>T          | Missense        | rs762168786        | 1                  |
|        | 2:g.47799065G>A          | Missense        | rs63750440         | 1                  |
|        | 2:g.47799639T>A          | Missense        | rs745937181        | 2                  |
|        | 2:g.47800636A>G          | Missense        | rs587782593        | 1                  |
|        | 2:g.47806650C>T          | Missense        | rs773763465        | 3                  |
| PMS2   | 7:g.5999217C>T           | Missense        | rs876658387        | 1                  |
| RAD51C | 17:g.58703259G>A         | Missense        | rs200857129        | 2                  |
| RAD51  | 17:g.58703259G>A         | Missense        | rs200857129        | 1                  |
| MUTYH  | 1:g.45333414C>T          | Missense        | rs587782683        | 1                  |
|        | 1:g.45331466C>T          | Missense        | rs748700385        | 1                  |
